# Supplementary material
Source: PubMed Central journal article supplement (PMC3133831)
Supplement: Supp_Data.pdf [file Supp_Data.pdf]

## Supplementary Data

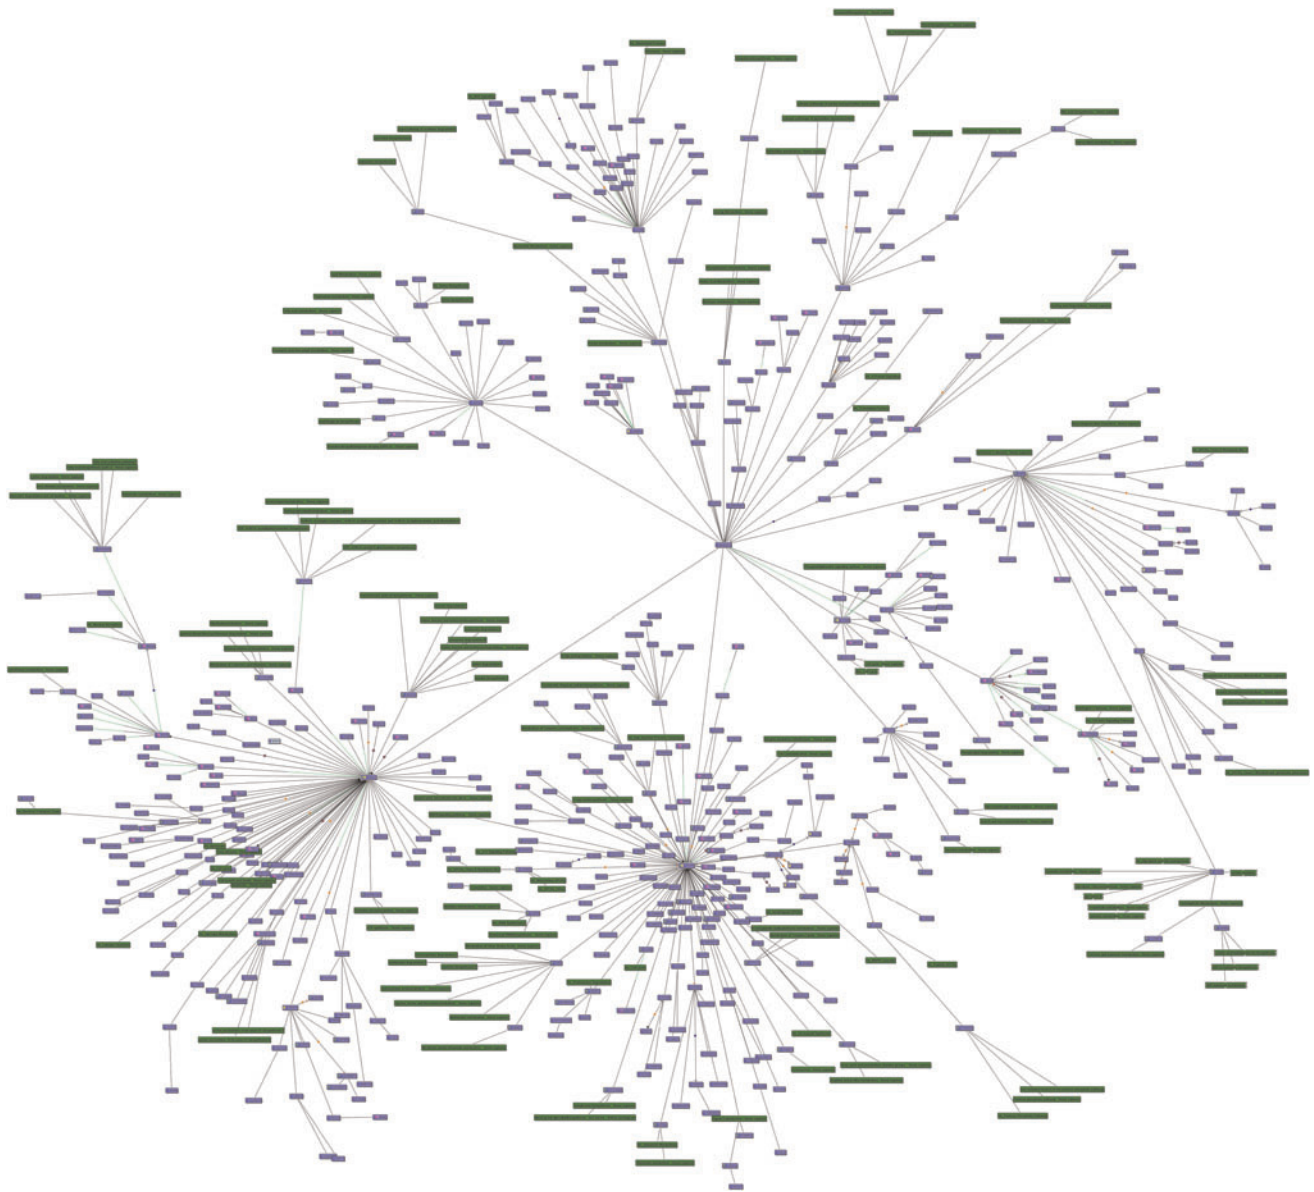

SUPPLEMENTARY FIG. 1. Detailed nodal analysis of Figure 3A.

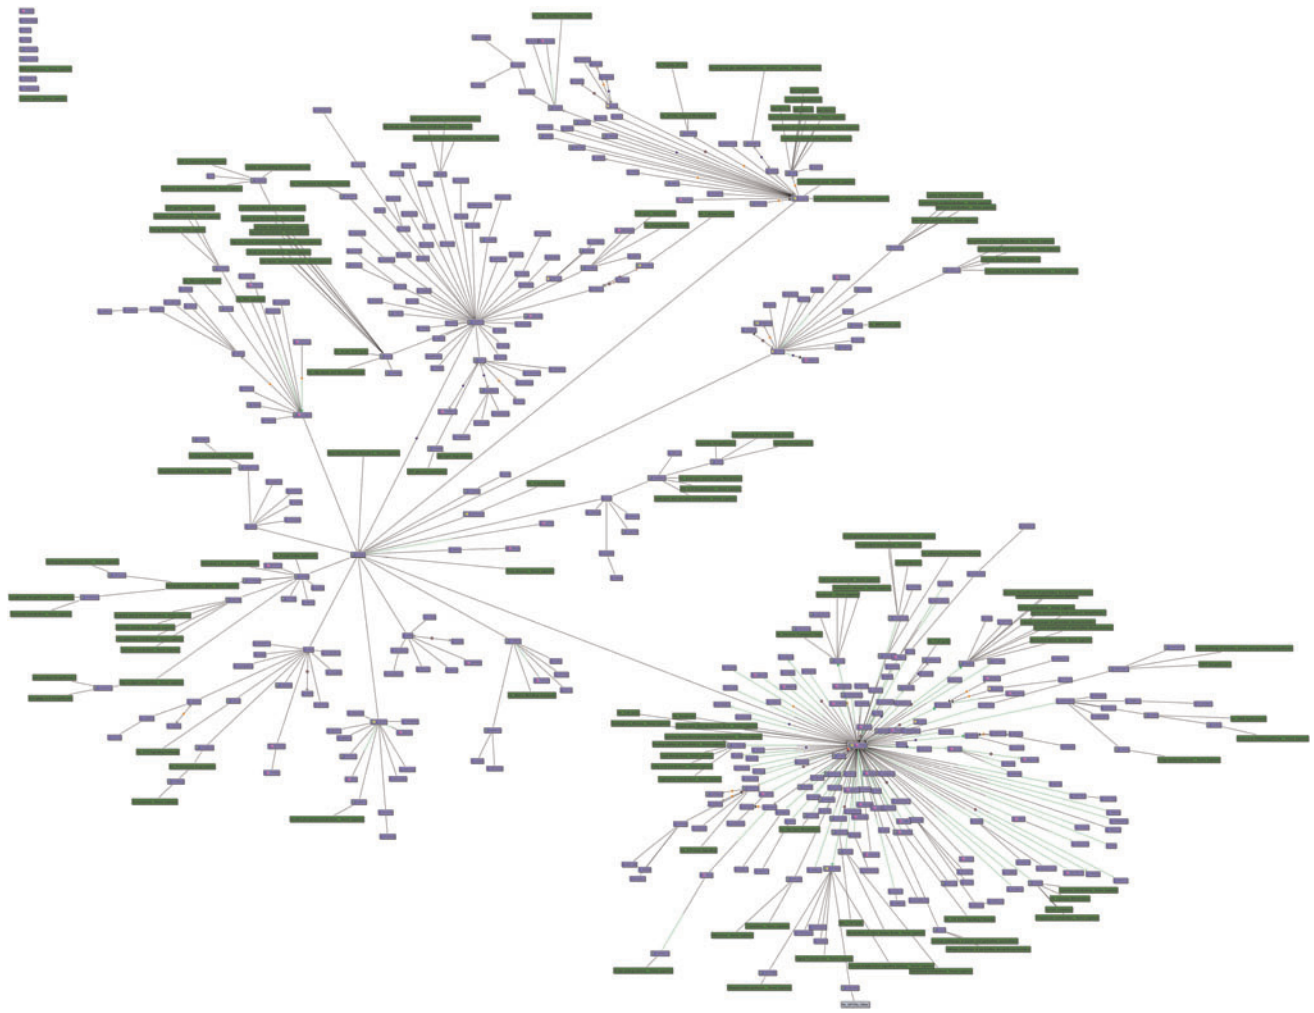

SUPPLEMENTARY FIG. 2. Detailed nodal analysis of Figure 3B.

SUPPLEMENTARY TABLE 1. LIST OF SYNAPOMORPHIES AT THE NODES 6, 8, 13, AND 15 OF FIGURE 2
